# Supplementary material for: Stress-independent delay time in yielding of dilute colloidal gels
Source: Royal Society of Chemistry journal article supplement (doi:10.1039/d3sm01238g), 2023-01-01
Supplement: d3sm01238g1.pdf [file d3sm01238g1.pdf]

## Supplemental Information

### Stress-Independent Delay Time in Yielding of Dilute Colloidal Gels

Atsushi Yamamoto,<sup>a</sup> Takumi Inui,<sup>b</sup> Daisuke Suzuki,<sup>\*b,c</sup> Kenji Urayama<sup>\*d</sup>

<sup>a</sup> Department of Macromolecular Science and Engineering, Kyoto Institute of Technology, Sakyo-ku, Kyoto 606-8585, Japan.

<sup>b</sup> Graduate School of Textile Science & Technology, Shinshu University, Ueda 386-8567, Japan.

<sup>c</sup> Research Initiative for Supra-Materials, Interdisciplinary Cluster for Cutting Edge Research, Shinshu University, Ueda 386-8567, Japan. E-mail: d\_suzuki@shinshu-u.ac.jp

<sup>d</sup> Department of Material Chemistry, Graduate School of Engineering, Kyoto University, Nishikyo-ku, Kyoto 615-8510, Japan. E-mail: urayama.kenji.2s@kyoto-u.ac.jp

\*Corresponding authors

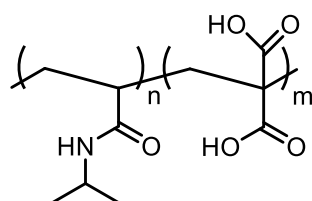

**Fig. S1** Chemical structure of the copolymer of *N*-isopropylacrylamide and fumaric acid, poly(*N*-isopropylacrylamide-*co*-fumaric acid). The incorporated fumaric acid into microgels was previously reported to be 0.37 mmol/g.<sup>1</sup>

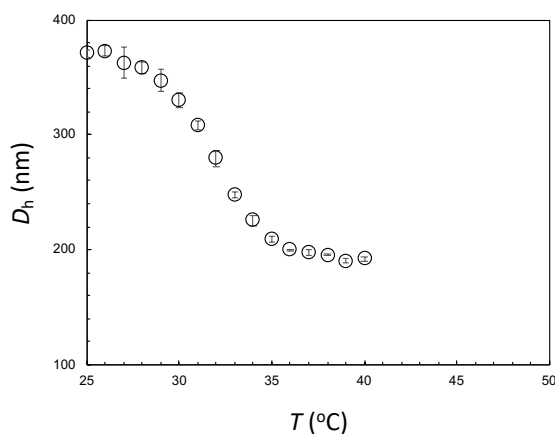

**Fig. S2** Temperature (*T*) dependence of hydrodynamic diameter (*D<sub>h</sub>*) of the Poly(NIPAM-*co*-FAc) microgel.

The hydrodynamic diameter ( $D_h$ ) of the isolated PNIPAM-*co*-FAc microgel was measured using a sufficiently dilute suspension of  $c = 5 \times 10^{-5}$  g/mL by dynamic light scattering (Malvern Instruments; zetasizer NanoS, Malvern, UK) at pH = 11 and  $I = 100$  mM. These conditions of pH and  $I$  are identical with those in the rheological tests for the colloidal gels.

The correlation function of the scattering intensity,  $g_2(\tau)$ , is given by the following eq S1, where  $\beta$  is the extrapolated value at  $\tau = 0$  and  $g_1(\tau)$  is the correlation function of the scattering electric field.

$$g_2(\tau) - 1 = \beta |g_1(\tau)|^2 \quad (\text{S1})$$

Here,  $g_1(\tau)$  is provided by the following eq S2,

$$g_1(\tau) = \exp(-Dq^2t) \quad (\text{S2})$$

where  $D$  is the diffusion coefficient and  $q$  is the scattering vector,  $(4\pi/\lambda)\sin(\theta/2)$  ( $\lambda = 633$  nm,  $\theta = 173^\circ$ ).

The hydrodynamic diameter,  $D_h$ , was calculated using the Stokes–Einstein equation, eq S3,

$$D_h = kT/3\pi\eta D \quad (\text{S3})$$

where  $k$  is the Boltzmann constant,  $T$  is the absolute temperature, and  $\eta$  is the viscosity of water. The  $D_h$  was calculated from the cumulant analysis of the correlation function, where diffusion coefficients were evaluated using the Stokes–Einstein equation (Zetasizer software v6.12) based on the average of three cycles of measurements.

The  $T$ -dependence of  $D_h$  was evaluated in the range of 25–40 °C. The measurements at  $T > 40$  °C were prevented by the aggregation of the microgels. However, the constancy of  $D_h$  (approximately 190 nm) at 35–40 °C ensures that the microgel at  $T > 35$  °C is in the fully shrunken state, allowing us to assume safely the constancy of  $D_h$  and particle volume fraction at  $T > 35$  °C.

## Reference

- 1) Nishizawa, Y.; Inui, T.; Namioka, R.; Uchihashi, T.; Watanabe, T.; Suzuki, D. Clarification of surface deswelling of thermo-responsive microgels by electrophoresis. *Langmuir*, **2022**, *38*(51), 16084–16093.
